# 1 An integrated genomic analysis of anaplastic meningioma identifies prognostic molecular 2 signatures

3

4 Grace Collord<sup>1,2,20</sup>, Patrick Tarpey<sup>1,20</sup>, Natalja Kurbatova<sup>3</sup>, Inigo Martincorena<sup>1</sup>, Sebastian  
5 Moran<sup>4</sup>, Manuel Castro<sup>4</sup>, Tibor Nagy<sup>1</sup>, Graham Bignell<sup>1</sup>, Francesco Maura<sup>1,5,6</sup>, Jorge  
6 Berna<sup>7</sup>, Jose M. Tubio<sup>7</sup>, Chris E. McMurran<sup>8</sup>, Adam M.H. Young<sup>8</sup>, Matthew D. Young<sup>1</sup>,  
7 Imran Noorani<sup>1,8</sup>, Stephen J Price<sup>8</sup>, Colin Watts<sup>8</sup>, Elke Leipnitz<sup>9</sup>, Matthias Kirsch<sup>9</sup>,  
8 Gabriele Schackert<sup>9</sup>, Danita Pearson<sup>10</sup>, Abel Devadass<sup>10</sup>, Zvi Ram<sup>16</sup>, V. Peter Collins<sup>10</sup>,  
9 Kieren Allinson<sup>10</sup>, Michael D. Jenkinson<sup>11,19</sup>, Rasheed Zakaria<sup>11,12</sup>, Khaja Syed<sup>11,12</sup>, C.  
10 Oliver Hanemann<sup>13</sup>, Jemma Dunn<sup>13</sup>, Michael W. McDermott<sup>14</sup>, Ramez W Kirollos<sup>8</sup>,  
11 George S. Vassiliou<sup>1,15</sup>, Manel Esteller<sup>4,17,18</sup>, Sam Behjati<sup>1,2</sup>, Alvis Brazma<sup>3</sup>, Thomas  
12 Santarius<sup>8\*</sup>, Ultan McDermott<sup>1\*</sup>

13

## 14 **Affiliations:**

15 <sup>1</sup> Wellcome Trust Sanger Institute, Wellcome Genome Campus, Hinxton, CB10 1SA, UK

16 <sup>2</sup> Department of Paediatrics, University of Cambridge, Cambridge Biomedical Campus,  
17 CB2 0QQ, UK

18 <sup>3</sup> European Molecular Biology Laboratory, European Bioinformatics Institute, EMBL-EBI,  
19 Wellcome Trust Genome Campus, Hinxton, CB10 1SD, UK

20 <sup>4</sup> Cancer Epigenetics and Biology Program (PEBC), Bellvitge Biomedical Research  
21 Institute (IDIBELL), L'Hospitalet de Llobregat, Barcelona, Catalonia, Spain

22 <sup>5</sup> Department of Oncology and Hemato-Oncology, University of Milan, Milan, Italy

23 <sup>6</sup> Department of Hematology, Fondazione IRCCS Istituto Nazionale dei Tumori, Milan,  
24 Italy

25 <sup>7</sup> Phylogenomics Lab, Edificio Torre CACTI, Campus Universitario, Universidad de Vigo,  
26 36310 Vigo, Spain

<sup>8</sup> Department of Neurosurgery, Department of Clinical Neuroscience, Cambridge

University Hospitals NHS Foundation Trust, Cambridge, CB2 0QQ, UK

<sup>9</sup> Klinik und Poliklinik für Neurochirurgie, "Carl Gustav Carus" Universitätsklinikum,

Technische Universität Dresden, Fetscherstrasse 74, 01307 Dresden, Germany

<sup>10</sup> Department of Pathology, Cambridge University Hospital, CB2 0QQ, Cambridge, UK

<sup>11</sup> Department of Neurosurgery, The Walton Centre, Liverpool, L9 7LJ, UK

<sup>12</sup> Institute of Integrative Biology, University of Liverpool, Liverpool, L9 7LJ, UK

<sup>13</sup> Institute of Translational and Stratified Medicine, Plymouth University Peninsula

Schools of Medicine and Dentistry, Plymouth University, Plymouth, Devon PL4 8AA, UK

<sup>14</sup> Department of Neurosurgery, UCSF Medical Center, San Francisco, CA 94143-0112,

USA

<sup>15</sup> Department of Haematology, Cambridge University Hospitals NHS Trust, Cambridge,

CB2 0QQ, UK

<sup>16</sup> Department of Neurosurgery, Tel-Aviv Medical Center, Tel-Aviv, Israel

<sup>17</sup> Physiological Sciences Department, School of Medicine and Health Sciences,

University of Barcelona (UB), Catalonia, Spain

<sup>18</sup> Institució Catalana de Recerca i Estudis Avançats (ICREA), Barcelona, Catalonia,

Spain

<sup>19</sup> Institute of Translational Medicine, University of Liverpool, Liverpool, L9 7LJ, UK

<sup>20</sup> These authors contributed equally to this work.

\* Corresponding authors

Correspondence should be addressed to:

U.M. ([um1@sanger.ac.uk](mailto:um1@sanger.ac.uk)), T.S. ([ts381@cam.ac.uk](mailto:ts381@cam.ac.uk))

## Abstract

Anaplastic meningioma is a rare and aggressive brain tumor characterised by intractable recurrences and dismal outcomes. Here, we present an integrated analysis of the whole genome, transcriptome and methylation profiles of primary and recurrent anaplastic meningioma. A key finding was the delineation of two distinct molecular subgroups that were associated with diametrically opposed survival outcomes. Relative to lower grade meningiomas, anaplastic tumors harbored frequent driver mutations in SWI/SNF complex genes, which were confined to the poor prognosis subgroup. Our analyses discern two biologically distinct variants of anaplastic meningioma with potential prognostic and therapeutic significance.

## Introduction

Meningiomas arise from arachnoidal cells of the meninges and are classified as grade I (80% of cases), grade II (10-20%) or grade III (1-3%)<sup>1,2</sup>. Grade III meningiomas comprise papillary, rhabdoid and anaplastic histological subtypes, with anaplastic tumors accounting for the vast majority of grade III diagnoses<sup>2,3</sup>. Nearly half of anaplastic meningiomas represent progression of a previously resected lower grade tumor, whereas the remainder arise *de novo*<sup>2,4,5</sup>. Recurrence rates are 5-20% and 20-40%, respectively, for grade I and 2 tumors<sup>3,6</sup>. By contrast, the majority of anaplastic meningioma patients suffer from inexorable recurrences with progressively diminishing benefit from repeated surgery and radiotherapy and 5-year overall survival of 30-60%<sup>4,7</sup>.

A recent study of 775 grade I and grade 2 meningiomas identified five molecular subgroups defined by driver mutation profile<sup>8</sup>. In keeping with previous smaller studies, mutually exclusive mutations in *NF2* and *TRAF7* were the most frequent driver events, followed by mutations affecting key mediators of PI3K and Hedgehog signalling<sup>8,9</sup>. Recurrent hotspot mutations were also identified in the catalytic unit of RNA polymerase II

(*POLR2A*) in 6% of grade I tumors<sup>8</sup>. More recently, a study comparing benign versus *de novo* atypical (grade II) meningiomas found the latter to be significantly associated with *NF2* and *SMARCB1* mutations<sup>10</sup>. Atypical meningiomas were further defined by DNA and chromatin methylation patterns consistent with upregulated PRC2 activity, differentially methylated Homeobox domains and transcriptional dysregulation of pathways involved in proliferation and differentiation<sup>10</sup>.

Despite the high mortality rate of anaplastic meningiomas, efforts to identify therapeutic strategies have been hampered by a limited understanding of the molecular features of this aggressive subtype. Here, we present an analysis of the genomic, transcriptional and DNA methylation patterns defining anaplastic meningioma. Our results reveal two distinct molecular subgroups associated with dramatically different prognoses.

## Results

### Overview of the genomic landscape of primary and recurrent anaplastic meningioma

We performed whole genome sequencing (WGS) on a discovery set of 19 anaplastic meningiomas resected at first presentation ('primary'). A subsequent validation cohort comprised 31 primary tumors characterised by targeted sequencing of 366 cancer genes. We integrated genomic findings with RNA sequencing and methylation array profiling in a subset of samples (Supplementary Table S1). Somatic copy number alterations and rearrangements were derived from whole genome sequencing reads, with RNA sequences providing corroborating evidence for gene fusions. Given the propensity of anaplastic meningioma to recur, we studied by whole genome sequencing 13 recurrences from 7 patients.

Excluding a hypermutated tumor (PD23359a, see Supplementary Discussion), the somatic point mutation burden of meningioma was low with a median of 28 somatic

coding mutations per tumor (range 11 to 71; mean sequencing coverage 66X) in 18 tumors interrogated by WGS at first presentation ('primary') (Supplementary Figure S1). Mutational signatures analysis of substitutions identified in whole genome sequences revealed the age-related, ubiquitous processes 1 and 5 as the predominant source of substitutions (Supplementary Figure S2)<sup>11</sup>.

The rearrangement profile of anaplastic meningioma is relatively quiet, with a median of 12 structural rearrangements (range 0–79) in the 18 primary tumor genomes (Supplementary Figure S3, Supplementary Table S3). Somatic retrotransposition events, a significant source of structural variants in over half of human cancers, were scarce (Supplementary Figure S4; Supplementary Table S4)<sup>12</sup>. Analysis of expressed gene fusions did not reveal any recurrent events involving putative cancer genes (Supplementary Table S5).

Recurrent large copy number changes were in keeping with known copy number trends in aggressive meningiomas, notably frequent deletions affecting chromosomes 1p, 6q, 14 and 22q (Figure 1b, Supplementary Table S6)<sup>2,8,10,13</sup>.

The genomic landscape of recurrent tumors was largely static both with respect to driver mutations and structural variation. Driver mutations differed between primary and recurrent tumors for two of eleven patients with serial resections available. For seven sets of recurrent tumors studied by whole genome sequencing, only two demonstrated any discrepancies in large copy number variants (PD23344 and PD23346; Supplementary Figure S5). Similarly, matched primary and recurrent samples clustered closely together by PCA of transcriptome data, suggesting minimal phenotypic evolution (Supplementary Figure S6).

# **Driver genes do not delineate subgroups of anaplastic meningioma**

Over 80% of low grade meningiomas segregate into 5 distinct subgroups based on driver mutation profile<sup>8,10</sup>. In anaplastic meningioma, however, we found a more uniform driver landscape dominated by deleterious mutations in *NF2* (Figure 1a). A key feature distinguishing anaplastic meningioma from its lower grade counterparts were driver events in genes of the SWI/SNF chromatin regulatory complex (Figure 1a). The most frequently mutated SWI/SNF component was *ARID1A*, which harbored at least one deleterious somatic change in 12% of our cohort of 50 primary tumors (Supplementary Table S1). *ARID1A* has not been implicated as a driver in grade I or grade II meningiomas<sup>8,10</sup>. Single variants in *SMARCB1*, *SMARCA4* and *PBRM1* were also detected in three tumors (Supplementary Figure S7). In total, 16% of anaplastic meningiomas contained a SWI/SNF gene mutation. By contrast, SWI/SNF genes are mutated in <5% of benign and atypical meningiomas<sup>8,10</sup>.

In the combined cohort of 50 primary tumors, we found at least one driver mutation in *NF2* in 70%, similar to the prevalence reported in atypical meningiomas and more than twice that found in grade I tumors<sup>8,10,14</sup>. Interestingly, there was no significant difference in *NF2* expression between *NF2* mutant and wild-type tumors (*p*-value 0.960; Supplementary Figure S8). We considered promoter hypermethylation as a source of *NF2* inactivation, but found no evidence of this (Supplementary Table S7). Thus, as observed in other cancer types, non-mutational mechanisms may contribute to *NF2* loss of function in a proportion of anaplastic meningiomas<sup>15-20</sup>.

Other driver genes commonly implicated in low grade tumors were not mutated, or very infrequently (Figure 1a). Furthermore, we did not observe an increased frequency of *TERT* promoter mutations, previously associated with progressive or high grade tumors<sup>21,22</sup>. Notably<sup>2,23,24</sup>, methylation analysis revealed *CDKN2A* and *PTEN* promoter hypermethylation in 17% and 11% of primary tumors, respectively (Figure 1a). We did not

find evidence of novel cancer genes in our cohort, applying established methods to search for enrichment of non-synonymous mutations (See Methods and Supplementary Methods). The full driver landscape of anaplastic meningioma, considering point mutations, structural variants with resulting copy number changes and promoter hypermethylation is presented in Supplementary Figure S7.

### **Differential gene expression defines anaplastic meningioma subgroups with prognostic and biological significance**

We performed messenger RNA (mRNA) sequencing of 31 anaplastic meningioma samples from a total of 28 patients (26 primary tumors and 5 recurrences). Gene expression variability within the cohort did not correlate with clinical parameters including prior radiotherapy, anatomical location or clinical presentation (*de novo* versus progressive tumor) (Supplementary Figure S6). However, multiple unsupervised hierarchical clustering methods and correlation measures consistently delineated two distinct clusters, hereafter referred to as C1 and C2 (Figure 2a-c). The clinical trajectories of patients in these clusters markedly diverged. We retrospectively sought follow-up survival data from the time of first surgery, which was available for 25 of the 28 patients included in the transcriptome analysis (12 patients in C1, 13 in C2; mean follow-up of 1,403 days from surgery). We observed a significantly worse overall survival outcome in C1 compared to C2 ( $p < 0.0001$ , hazard ratio 17.0 (95% CI 5.2-56.0)) (Figure 2g; Supplementary Table S8). The subgroups were well balanced with respect to potential confounding features such as gender, age, radiotherapy and anatomical location (Supplementary Table S9). Paradoxically, a greater proportion of C2 patients had higher Simpson surgical resection scores (indicating more residual tumor after surgery), conventionally a negative prognostic indicator ( $P = 0.081$ , Fisher's exact test)<sup>4,6</sup>.

## **Transcriptional programmes segregating anaplastic meningioma**

Nineteen hundred genes underpinned the differentiation of anaplastic meningioma into subgroups C1 and C2, which could be reduced to only 6 transcripts selected on the basis of PCA coefficient and differential expression analysis (see Methods; Supplementary Tables S10 and S11; Supplementary Figure S9). Pathway enrichment analysis was most significant for evidence of epithelial-mesenchymal transition (EMT) in the C1 tumors, with concordant loss of E-cadherin (*CDH1*) and upregulation of *CXCL14*, both prognostic biomarkers in diverse other cancers (Supplementary Table S12, Figure 2d-f)<sup>25-32</sup>. The C1 and C2 tumors were further distinguished by significant dysregulation of proliferation, PRC2 activity and embryonic stem cell transcriptional programmes (Supplementary Table S13). Hox genes constituted a notable proportion of the transcripts distinguishing the two anaplastic meningioma subgroups, largely underpinning the significance of pathways involved in tissue morphogenesis. Furthermore, differentially methylated genes were also significantly enriched for Hox genes, with pathway analysis results corroborating the main biological themes emerging from transcriptome analysis (Supplementary Tables S14 and S15).

## **Comparison of the anaplastic and benign meningioma transcriptome**

Previous studies investigating the relationship between meningioma WHO grade and gene expression profiles have included few anaplastic tumors<sup>33,34</sup>. We therefore extended our analysis to include published RNA sequences from 19 benign grade I meningiomas. External data was processed using our in-house pipeline with additional measures taken to minimise batch effects (see Methods and Supplementary Tables S16 and S17). Unsupervised hierarchical clustering and principal component analysis demonstrated clear tumor segregation by histological grade (Figure 3a,b).

Consistent with there being a coherent biological trend across histological grades and anaplastic meningioma subgroups, we noted significant overlap between genes differentially expressed between grades and between C1 and C2 tumors (hypergeometric distribution  $P = 5.084\text{E-}09$ ). In keeping with this finding, formal pathway analysis identified significant dysregulation of stemness, proliferation, EMT and PRC2 activity (Supplementary Tables S18 and S19). The most significantly dysregulated pathways also included TGF-beta, Wnt and integrin signalling, mediators of invasion and mesenchymal differentiation that are normally in part controlled by NF2 and other Hippo pathway members<sup>15,16,35-37</sup>. Yes-associated protein 1 (Yap1), a cornerstone of oncogenic Hippo signalling, is frequently overexpressed in cancer and synergises with Wnt signalling to induce EMT<sup>15,37-39</sup>. *YAP1* was upregulated in anaplastic tumors ( $\log_2$  fold change = 2.18, FDR = 0.0062) along with *MYL9* ( $\log_2$  fold change = 6.25, FDR =  $3.76\text{E-}18$ ), a key downstream effector essential for Yap1-mediated stromal reprogramming (Figure 3c)<sup>38</sup>. Additionally, the anaplastic tumors demonstrated further upregulation of major growth factor receptor and kinase circuits previously implicated in meningioma pathogenesis, notably epidermal growth factor receptor (EGFR), insulin-like growth factor (IGFR), vascular endothelial growth factor receptor (VEGFR) and mTOR complex 1 (mTORC1) kinase complex<sup>40-45</sup>.

## Discussion

Meningiomas constitute a common, yet diverse tumor type with few therapeutic options<sup>1,7,8,10</sup>. Efforts to improve clinical outcomes have been hampered by limited understanding of the molecular determinants of aggressive disease. Here, we explored genomic, epigenetic and transcriptional features of anaplastic meningioma, the most lethal meningioma subtype<sup>4</sup>.

Frequent somatic changes in SWI/SNF complex genes, predominantly *ARID1A*, constitute the main genomic distinction between anaplastic and lower grade meningiomas<sup>8,10</sup>. SWI/SNF acts as a tumor suppressor in many cell types by antagonising the chromatin modifying Polycomb repressive complex 2 (PRC2)<sup>46-48</sup>. Deleterious SWI/SNF mutations unfetter PRC2 activity with profound consequences for primitive developmental pathways frequently co-opted during oncogenesis<sup>48,49</sup>. SWI/SNF inactivation is associated with a stem cell-like phenotype and poor outcomes in diverse cancer types<sup>50-54</sup>.

Although anaplastic tumors resist meaningful classification based on driver mutation patterns, unbiased transcriptional profiling revealed two biologically distinct subgroups with dramatically divergent survival outcomes. This finding is emblematic of the limitations of histopathological grading as a risk stratification system for meningioma<sup>1,3,4,13,55</sup>. Interestingly, all SWI/SNF mutations were exclusively identified in the poor prognosis (C1) subgroup ( $P = 0.016$ , Fisher's exact test). C1 tumors were further characterised by transcriptional signatures of PRC2 target activation, stemness, proliferation and mesenchymal differentiation. These findings were in part underpinned by differential expression of Hox genes. Acquisition of invasive capacity and stem cell traits are frequently co-ordinately dysregulated in cancer, often through subversion of Hox gene programmes integral to normal tissue morphogenesis<sup>56-58</sup>. Hox genes have a central role in orchestrating vertebrate development and act as highly context-dependent oncogenes and tumor suppressors in cancer<sup>57,59</sup>. Several of the most starkly upregulated Hox genes in the C1 tumors consistently function as oncogenes across a range of solid and haematological malignancies, including *HOTAIR*, *HOXB7*, *HOXA4*, *HOXA-AS2*, *HOXC11*, and *NKX2-2*<sup>57,60-70</sup>. Like many long non-coding RNAs (lncRNA), *HOTAIR* and *HOXA-AS2* modulate gene expression primarily by interacting directly with chromatin

remodelling complexes, exerting oncogenic activity by recruiting PRC2 to target genes<sup>60,62,69-73</sup>. *HOXA-AS2* has been shown to mediate transcriptional repression of the tumor suppressor gene *CDKN2A* (p16<sup>INK4A</sup>), loss of which is associated with poor meningioma survival<sup>23,24,60,69,70</sup>. Given the antagonistic relationship between the SWI/SNF and PRC2 chromatin regulators, deleterious SWI/SNF mutations and overexpression of lncRNAs known to mediate PRC2 activity emerge as potentially convergent mechanisms underpinning the differences between C1 and C2 tumors<sup>49</sup>.

In the context of recent studies of lower grade meningiomas, our findings raise the possibility that the balance between PRC2 and SWI/SNF activity may have broader relevance to meningioma pathogenesis. Compared to grade I tumors, atypical meningiomas are more likely to harbor *SMARCB1* mutations and large deletions encompassing chromosomes 1q, 6q and 14q. Notably, these genomic regions encompass *ARID1A* and several other SWI/SNF subunit genes. Both *SMARCB1* mutations and the aforementioned copy number changes were associated with epigenetic evidence of increased PRC2 activity, differential Homeobox domain methylation, and upregulation of proliferation and stemness programmes in the atypical tumors.

The extent to which SWI/SNF depletion plays a role in lower grade meningiomas may be therapeutically relevant. Diverse SWI/SNF mutated cancers exhibit dependence on both catalytic and non-catalytic functions of EZH2, a core subunit of PRC2<sup>74-76</sup>. Several EZH2 inhibitors are in development with promising initial clinical results<sup>77</sup>. Other modulators of PRC2 activity, including HOTAIR, may also be relevant therapeutic targets<sup>78,79</sup>. Furthermore, growing recognition of the relationship between EMT and resistance to conventional and targeted anti-cancer agents has profound implications for rational

integration of treatment approaches<sup>80,81</sup>. Notably, EGFR inhibition has yielded disappointing response rates in meningioma<sup>41,82</sup>. A mesenchymal phenotype is strongly associated with resistance to EGFR inhibitors in lung and colorectal cancer<sup>80,81,83-85</sup>. Combining agents that abrogate EMT with other therapies is a promising strategy for addressing cell-autonomous and extrinsic determinants of disease progression and may warrant further investigation in meningioma<sup>80,86</sup>.

This study has revealed prognostically significant anaplastic meningioma subgroups and identified potentially actionable alternations in SWI/SNF genes and other therapeutically tractable targets. However, a substantially larger series of tumors, ideally nested in a prospective multicentre observational study, will be required to expand upon our main findings and explore mechanistic and therapeutic ramifications of meningioma diversity.

## Methods

### Sample selection

DNA was extracted from 70 anaplastic meningiomas; 51 samples at first resection ('primary') and 19 from subsequent recurrences. Matched normal DNA was derived from peripheral blood lymphocytes. Written informed consent was obtained for sample collection and DNA sequencing from all patients in accordance with the Declaration of Helsinki and protocols approved by the NREC/Health Research Authority (REC reference 14/YH/0101) and Ethics Committee at University Hospital Carl Gustav Carus, Technische Universität Dresden, Germany (EK 323122008). Samples underwent independent specialist pathology review (V.P.C and K.A). DNA extracted from fresh-frozen material was submitted for whole genome sequencing whereas that derived from formalin-fixed paraffin-embedded (FFPE) material underwent deep targeted sequencing of 366 cancer genes.

One tumor sample PD23348 (and two subsequent recurrences) separated from the main study samples in a principal components analysis of transcriptomic data (Supplementary Figure S10). Analysis of WGS and RNA sequencing data identified an expressed gene fusion, *NAB2-STAT6*. This fusion is pathognomonic of meningeal hemangiopericytoma, now classified as a separate entity, solitary fibrous tumors<sup>87-89</sup>. We therefore excluded three samples from this tumor from further study. A second sample (PD23354a), diagnosed as an anaplastic meningioma with papillary features, was found to have a strong APOBEC mutational signature as well as an *EML4-ALK* gene fusion (exon 6 *EML4*, exon 19 *ALK*) (Supplementary Figure S11)<sup>90</sup>. Therefore this sample was also removed as a likely metastasis from a primary lung adenocarcinoma. The hypermutator sample PD23359a underwent additional pathological review to confirm the diagnosis of

anaplastic meningioma (K.A., Department of Histopathology, Cambridge University Hospital, Cambridge, UK).

RNA was extracted from fresh-frozen material from 34 primary and recurrent tumors, 3 of which were from PD23348 and were subsequently excluded from final analyses (Supplementary Table S1).

**Whole genome sequencing** Short insert 500bp genomic libraries were constructed, flowcells prepared and sequencing clusters generated according to Illumina library protocols<sup>91</sup>. 108 base/100 base (genomic), or 75 base (transcriptomic) paired-end sequencing were performed on Illumina X10 genome analyzers in accordance with the Illumina Genome Analyzer operating manual. The average sequence coverage was 65.8X for tumor samples and 33.8X for matched normal samples (Supplementary Table S1).

### **Targeted genomic sequencing**

For targeted sequencing we used a custom cRNA bait set (Agilent) to enrich for all coding exons of 366 cancer genes (Supplementary Table S20). Short insert libraries (150bp) were prepared and sequenced on the Illumina HiSeq 2000 using 75 base paired-end sequencing as per Illumina protocol. The average sequence coverage was 469X for the tumor samples.

### **RNA sequencing and data processing**

For transcriptome sequencing, 350bp poly-A selected RNA libraries were prepared on the Agilent Bravo platform using the Stranded mRNA library prep kit from KAPA Biosystems. Processing steps were unchanged from those specified in the KAPA manual except for

use of an in-house indexing set. Reads were mapped to the GRCh37 reference genome using STAR (v2.5.0c)<sup>92</sup>. Mean sequence coverage was 128X. Read counts per gene, based on the union of all exons from all possible transcripts, were then extracted from BAM files using HTseq (v0.6.1)<sup>93</sup>. Transcripts Per kilobase per Million reads (TPM) were generated using an in-house python script ([https://github.com/TravisCG/Sl\\_scripts/blob/master/tpm.py](https://github.com/TravisCG/Sl_scripts/blob/master/tpm.py))<sup>92,93</sup>. We downloaded archived RNA sequencing FASTQ files for 19 grade I meningioma samples representing the major mutational groups (*NF2*/chr22 loss, *POLR2A*, *KLF4/TRAFF7*, *PI3K* mutant) (ArrayExpress: GSE85133)<sup>8</sup>. Reads were then processed using STAR and HTseq as described above. Cancer cell line (n=252) and triple-negative breast cancer (n = 100) RNA sequencing data was generated in-house by the aforementioned sequencing and bioinformatic pipeline.

Expressed gene fusions were sought using an in-house pipeline incorporating three algorithms: TopHat-Fusion (v2.1.0), STAR-Fusion (v0.1.1) and deFuse (v0.7.0) (<https://github.com/cancerit/cgpRna>)<sup>92,94,95</sup>. Fusions identified by one or two algorithms or also detected in the matched normal sample were flagged as likely artefacts. Fusions were further annotated according to whether they involved a kinase or known oncogene and whether they occurred near known fragile sites or rearrangement break points<sup>96</sup> (Supplementary Table S5).

### **Differential gene expression and pathway enrichment analysis**

The DESeq2 R package was used for all differential gene expression analyses<sup>97,98</sup>. DESeq2 uses shrinkage estimation of dispersion for the sample-specific count normalization and subsequently applies a linear regression method to identify differentially expressed genes (DEGs)<sup>97,98</sup>.

Preliminary comparison of anaplastic and externally-generated grade I meningioma data revealed evidence of laboratory batch effects, which we mitigated with two batch-correction methods: RUVg and PEER<sup>99,100</sup>. RUVg estimates the factor attributed to spurious variation using control genes that are assumed to have constant expression across samples<sup>101-103</sup>. We selected control genes (*RPL37A*, *EIF2B1*, *CASC3*, *IPO8*, *MRPL19*, *PGK1* and *POP4*) on the basis of previous studies of suitable control genes for transcript-based assays in meningioma<sup>104</sup>. PEER ('probabilistic estimation of expression residuals') is based on factor analysis methods that infer broad variance components in the measurements. PEER can find hidden factors that are orthogonal to the known covariates. We applied this feature of PEER to remove additional hidden effect biases. The final fitted linear regression model consists of the factor identified by RUVg method that represents the unwanted laboratory batch effect and 13 additional hidden factors found by PEER that are orthogonal to the estimated laboratory batch effect. Using this approach we were able to reduce the number of DEGs from more than 18000 to 8930, of which <4,000 are predicted to be protein-coding.

To identify biological pathways differentially expressed between meningioma grades and anaplastic meningioma subgroups we applied a functional class scoring algorithm using a collection of 461 published gene sets mapped to 10 canonical cancer hallmarks (Supplementary Table S21)<sup>56,105-109</sup>. We further corroborated these findings with a more general Gene Ontology (GO) pathway analysis<sup>110</sup>.

### **Identification of 6 transcripts recapitulating anaplastic meningioma clusters**

Mapped RNA sequencing reads were normalised using the regularised logarithm (rlog) function implemented by the DESeq2 package<sup>97,98</sup>. PCA was performed using the top 500 most variably expressed transcripts and the prcomp function (R stats package)<sup>111</sup>. Given that primary component 1 (PC1) was the vector most clearly distinguishing the closely

clustered C2 subgroup from the more diffusely clustered C1 (Figure 3a), we extracted the top 50 transcripts with the highest absolute PC1 coefficients. We then identified the subset that overlapped with the most significantly differentially expressed genes (absolute  $\log_2$  fold change  $> 4$  and adjusted  $p$ -value  $< 0.0001$ ) between i) the C1 and C2 anaplastic meningioma subgroups and ii) the C1 anaplastic meningiomas and the 19 grade I tumors (Supplementary Tables S10 and S17). Iteratively reducing the number of PC1 components identified the minimum number of transcripts that recapitulated segregation of C1 and C2 tumors upon unsupervised hierarchical clustering and PCA (Supplementary Table S11; Supplementary Figure S9).

#### **Processing of genomic sequencing data**

Genomic reads were aligned to the reference human genome (GRCh37) using the Burrows-Wheeler Aligner, BWA (v0.5.9)<sup>112</sup>. CaVEMan (Cancer Variants Through Expectation Maximization: <http://cancerit.github.io/CaVEMan/>) was used for calling somatic substitutions. Small insertions and deletions (indels) in tumor and normal reads were called using a modified Pindel version 2.0. (<http://cancerit.github.io/cgpPindel/>) on the NCBI37 genome build<sup>113,114</sup>. Annotation was according to ENSEMBL version 58. Structural variants were called using a bespoke algorithm, BRASS (Breakpoint AnalySiS) (<https://github.com/cancerit/BRASS>) as previously described<sup>115</sup>.

The ascatNGS algorithm was used to estimate tumor purity and ploidy and to construct copy number profiles from whole genome data<sup>116</sup>.

#### **Identification of cancer genes based on the impact of coding mutations**

To identify recurrently mutated driver genes, we applied a dN/dS method that considers the mutation spectrum, the sequence of each gene, the impact of coding substitutions (synonymous, missense, nonsense, splice site) and the variation of the mutation rate

across genes<sup>115</sup>. To detect genes under significant selective pressure by either point mutations or indels, each gene's *P*-values from dN/dS analysis of substitutions and from the recurrence analysis of indels were combined using Fisher's method. Multiple testing correction (Benjamini-Hochberg FDR) was performed separately for all genes, stratifying the FDR correction to increase sensitivity<sup>117</sup>. To achieve a low false discovery rate a conservative *q*-value cutoff of <0.05 was used for significance and considered significant any gene with *q*<sub>mis\_sfdr</sub><0.05 OR *q*<sub>global\_sfdr</sub><0.05. See Supplementary Methods.

### **Identification of driver mutations in known cancer genes**

Non-synonymous coding variants detected by Caveman and Pindel algorithms were flagged as putative driver mutations according to set criteria and further curated following manual inspection in the Jbrowse genome browser<sup>118</sup>. Variants were screened against lists of somatic mutations identified by a recent study of 11,119 human tumors encompassing 41 cancer types and also against a database of validated somatic drivers identified in cancer sequencing studies at the Wellcome Trust Sanger Institute (Supplementary Tables S22 and S23)<sup>119</sup>.

Copy number data was analysed for homozygous deletions encompassing tumor suppressor genes and for oncogene amplifications exceeding 5 or 9 copies for diploid and tetraploid genomes, respectively. Only focal (<1Mb) copy number variants meeting these criteria were considered potential drivers. Additional truncating events (disruptive rearrangement break points, nonsense point mutations, essential splice site mutations and out of frame indels) in established tumor suppressors were also flagged as potential drivers. Only rearrangements with breakpoints able to be reassembled at base pair resolution are included in this dataset.

## **TraFiC pipeline for retrotransposon integration detection**

For the identification of putative solo-L1 and L1-transduction integration sites, we used the TraFiC (Transposome Finder in Cancer) algorithm<sup>12</sup>. TraFiC uses paired-end sequencing data for the detection of somatic insertions of transposable elements (TEs) and exogenous viruses. The identification of somatic TEs (solo-L1, Alu, SINE, and ERV) is performed in three steps: (i) selection of candidate reads, (ii) transposable element masking, (iii) clustering and prediction of TE integration sites and (iv) filtering of germline events<sup>12</sup>.

## **Methylation arrays and analysis**

We performed quantitative methylation analysis of 850,000 CpG sites in 25 anaplastic meningiomas. Bisulfite-converted DNA (bs-DNA) was hybridized on the Illumina Infinium HumanMethylationEPIC BeadChip array following the manufacturer's instructions. All patient DNA samples were assessed for integrity, quantity and purity by electrophoresis in a 1.3% agarose gel, picogreen quantification and Nanodrop measurements. Bisulfite conversion of 500 ng of genomic DNA was done using the EZ DNA Methylation Kit (Zymo Research), following the manufacturer's instructions. Resulting raw intensity data (IDATs) were normalized under R statistical environment using the Illumina normalization method developed under the minfi package (v1.19.10). Normalized intensities were then used to calculate DNA methylation levels (beta values). Then, we excluded from the analysis the positions with background signal levels in methylated and unmethylated channels ( $p > 0.01$ ). Finally we removed probes with one or more single nucleotide polymorphisms (SNPs) with a minor allele frequency (MAF)  $> 1\%$  in the first 10 bp of the interrogated CpG, as well as the probes related to X and Y chromosomes. From the filtered positions, we selected only CpG sites present both in promoter regions (TSS, 5'UTR and 1st exon) and CpG islands (UCSC database, genome version hg19).

For the supervised analysis of the probes, CpG sites were selected by applying an ANOVA test to identify statistically significant CpG positions (FDR adjusted p-value < 0.01) that were differentially methylated among the compared groups ( $\Delta\beta > 0.2$ ). Selected CpG sites were later clustered based on the Manhattan distances aggregated by ward's linkage. Finally, the genes corresponding to the selected CpGs were used to perform a Gene Set Enrichment Analysis (GSEA) with curated gene sets in the Molecular Signatures Database<sup>120</sup>. The gene sets used were: H: hallmark gene sets, BP: GO biological process, CC: GO cellular component, MF: GO molecular function and C3: motif gene sets (<http://software.broadinstitute.org/gsea/msigdb/collections.jsp>). The gene clusters resulting from the hypergeometric test with a FDR adjusted p-value < 0.05 were finally considered. We observed high levels of methylation for *CREBBP* in the majority of tumor samples, however, similar patterns were manifest in normal tissue controls, hence *CREBBP* hypermethylation does not appear to be a feature of oncogenesis in these samples.

### **Mutational signature analysis**

Mutational signature extraction was performed using the nonnegative matrix factorization (NNMF) algorithm<sup>11</sup>. Briefly, the algorithm identifies a minimal set of mutational signatures that optimally explains the proportions of mutation types found across a given mutational catalogue and then estimates the contribution of each identified signature to the mutation spectra of each sample.

### **Patient survival analysis**

The Kaplan-Meier method was used to analyze survival outcomes by the log-rank Mantel-Cox test, with hazard ratio and two-sided 95% confidence intervals calculated using the Mantel-Haenszel test (GraphPad Prism, ver 7.02). Overall survival data from

time of first surgery for each anaplastic meningioma within gene-expression defined subgroups 1 and 2 was collected and used to plot a Kaplan-Meier survival curve.

## **Data availability**

All sequencing data that support the findings of this study have been deposited in the European Genome-Phenome Archive and are accessible through the accession numbers EGAS00001000377, EGAS00001000828, EGAS00001000859, EGAS00001001155 and EGAS00001001873. All other relevant data are available from the corresponding author on request.

## **Supplementary Discussion**

### **A hypermutator anaplastic meningioma with a haploid genome**

One primary anaplastic meningioma resected from an 85-year old female (PD23359a) had a hypermutator phenotype, with 27,332 point mutations and LOH across nearly its entire genome (Supplementary Figure S12; Supplementary Table S24). Independent pathological review confirmed the original diagnosis of anaplastic meningioma, and transcriptome analysis confirmed that this tumor clustered appropriately with the rest of the cohort (Figure 3a,b). The majority of the mutations were substitutions, 72% of which were C>T transitions. We identified two deleterious mutations in DNA damage repair mediators: a *TP53* p.R248Q missense mutation and a homozygous truncating variant in the mismatch repair gene *MSH6* (p.L1330Vfs\*9). Despite the latter finding, mutational signatures analysis was dominated by signature 1, with no evidence of signatures typically associated with defects in homologous recombination, mismatch repair or *POLE* activity (signatures 3, 6, 10, 15, 20 or 26). The copy number profile is most consistent with this tumor having first undergone haploidization of its genome, with the exception of chromosomes 7, 19 and 20, followed by whole genome duplication (Supplementary

Figure S12). Of note, several important oncogenes are located on chromosome 7, including *EGFR*, *MET* and *BRAF*. Widespread LOH has been described in a significant proportion of oncocytic follicular thyroid cancers where preservation of chromosome 7 heterozygosity has also been observed<sup>121</sup>.

# References

- 1 Louis, D. N. *et al.* The 2016 World Health Organization Classification of Tumors of the Central Nervous System: a summary. *Acta Neuropathol* **131**, 803-820, doi:10.1007/s00401-016-1545-1 (2016).
- 2 Mawrin, C. & Perry, A. Pathological classification and molecular genetics of meningiomas. *J Neurooncol* **99**, 379-391, doi:10.1007/s11060-010-0342-2 (2010).
- 3 Rogers, C. L. *et al.* Pathology concordance levels for meningioma classification and grading in NRG Oncology RTOG Trial 0539. *Neuro Oncol* **18**, 565-574, doi:10.1093/neuonc/nov247 (2016).
- 4 Champeaux, C., Wilson, E., Brandner, S., Shieff, C. & Thorne, L. World Health Organization grade III meningiomas. A retrospective study for outcome and prognostic factors assessment. *Br J Neurosurg* **29**, 693-698, doi:10.3109/02688697.2015.1054350 (2015).
- 5 Moliterno, J. *et al.* Survival in patients treated for anaplastic meningioma. *Journal of neurosurgery* **123**, 23-30, doi:10.3171/2014.10.JNS14502 (2015).
- 6 Durand, A. *et al.* WHO grade II and III meningiomas: a study of prognostic factors. *J Neurooncol* **95**, 367-375, doi:10.1007/s11060-009-9934-0 (2009).
- 7 Buttrick, S., Shah, A. H., Komotar, R. J. & Ivan, M. E. Management of Atypical and Anaplastic Meningiomas. *Neurosurg Clin N Am* **27**, 239-247, doi:10.1016/j.nec.2015.11.003 (2016).
- 8 Clark, V. E. *et al.* Recurrent somatic mutations in POLR2A define a distinct subset of meningiomas. *Nat Genet* **48**, 1253-1259, doi:10.1038/ng.3651 (2016).
- 9 Clark, V. E. *et al.* Genomic analysis of non-NF2 meningiomas reveals mutations in TRAF7, KLF4, AKT1, and SMO. *Science* **339**, 1077-1080, doi:10.1126/science.1233009 (2013).
- 10 Harmanci, A. S. *et al.* Integrated genomic analyses of de novo pathways underlying atypical meningiomas. *Nature communications* **8**, 14433, doi:10.1038/ncomms14433 (2017).
- 11 Alexandrov, L. B. *et al.* Signatures of mutational processes in human cancer. *Nature* **500**, 415-421, doi:10.1038/nature12477 (2013).
- 12 Tubio, J. M. *et al.* Mobile DNA in cancer. Extensive transduction of nonrepetitive DNA mediated by L1 retrotransposition in cancer genomes. *Science* **345**, 1251343, doi:10.1126/science.1251343 (2014).
- 13 Sahm, F. *et al.* DNA methylation-based classification and grading system for meningioma: a multicentre, retrospective analysis. *Lancet Oncol*, doi:10.1016/S1470-2045(17)30155-9 (2017).
- 14 Forbes, S. A. *et al.* COSMIC: somatic cancer genetics at high-resolution. *Nucleic acids research* **45**, D777-d783, doi:10.1093/nar/gkw1121 (2017).
- 15 Harvey, K. F., Zhang, X. & Thomas, D. M. The Hippo pathway and human cancer. *Nat Rev Cancer* **13**, 246-257, (2013).
- 16 McClatchey, A. I. Merlin and ERM proteins: unappreciated roles in cancer development? *Nat Rev Cancer* **3**, 877-883 (2003).
- 17 Petrilli, A. M. & Fernandez-Valle, C. Role of Merlin/NF2 inactivation in tumor biology. *Oncogene* **35**, 537-548, doi:10.1038/onc.2015.125 (2016).
- 18 Morales, F. C., Molina, J. R., Hayashi, Y. & Georgescu, M. M. Overexpression of ezrin inactivates NF2 tumor suppressor in glioblastoma. *Neuro Oncol* **12**, 528-539, doi:10.1093/neuonc/nop060 (2010).
- 19 Shaw, R. J. *et al.* The Nf2 tumor suppressor, merlin, functions in Rac-dependent signaling. *Dev Cell* **1**, 63-72 (2001).
- 20 Xiao, G. H., Beeser, A., Chernoff, J. & Testa, J. R. p21-activated kinase links Rac/Cdc42 signaling to merlin. *J Biol Chem* **277**, 883-886, doi:10.1074/jbc.C100553200 (2002).
- 21 Goutagny, S. *et al.* High incidence of activating TERT promoter mutations in meningiomas undergoing malignant progression. *Brain Pathol* **24**, 184-189, doi:10.1111/bpa.12110 (2014).
- 22 Koelsche, C. *et al.* Distribution of TERT promoter mutations in pediatric and adult tumors of the nervous system. *Acta Neuropathol* **126**, 907-915, doi:10.1007/s00401-013-1195-5 (2013).
- 23 Bostrom, J. *et al.* Alterations of the tumor suppressor genes CDKN2A (p16(INK4a)), p14(ARF), CDKN2B (p15(INK4b)), and CDKN2C (p18(INK4c)) in atypical and anaplastic meningiomas. *Am J Pathol* **159**, 661-669, doi:10.1016/S0002-9440(10)61737-3 (2001).
- 24 Goutagny, S. *et al.* Genomic profiling reveals alternative genetic pathways of meningioma malignant progression dependent on the underlying NF2 status. *Clin Cancer Res* **16**, 4155-4164, doi:10.1158/1078-0432.CCR-10-0891 (2010).

593 25 Paredes, J. *et al.* Epithelial E- and P-cadherins: role and clinical significance in cancer. *Biochimica*  
594 *et biophysica acta* **1826**, 297-311, doi:10.1016/j.bbcan.2012.05.002 (2012).

595 26 Berx, G. & van Roy, F. Involvement of members of the cadherin superfamily in cancer. *Cold*  
596 *Spring Harbor perspectives in biology* **1**, a003129, doi:10.1101/cshperspect.a003129 (2009).

597 27 Alexiadis, M. *et al.* Transcriptomic analysis of stage 1 versus advanced adult granulosa cell  
598 tumors. *Oncotarget* **7**, 14207-14219, doi:10.18632/oncotarget.7422 (2016).

599 28 Augsten, M. *et al.* Cancer-associated fibroblasts expressing CXCL14 rely upon NOS1-derived  
600 nitric oxide signaling for their tumor-supporting properties. *Cancer Res* **74**, 2999-3010,  
601 doi:10.1158/0008-5472.can-13-2740 (2014).

602 29 Sjoberg, E., Augsten, M., Bergh, J., Jirstrom, K. & Ostman, A. Expression of the chemokine  
603 CXCL14 in the tumour stroma is an independent marker of survival in breast cancer. *Br J Cancer*  
604 **114**, 1117-1124, doi:10.1038/bjc.2016.104 (2016).

605 30 Zakrzewski, K. *et al.* Transcriptional profiles of pilocytic astrocytoma are related to their three  
606 different locations, but not to radiological tumor features. *BMC Cancer* **15**, 778,  
607 doi:10.1186/s12885-015-1810-z (2015).

608 31 Zeraati, M. *et al.* Cancer-associated noncoding mutations affect RNA G-quadruplex-mediated  
609 regulation of gene expression. *Sci Rep* **7**, 708, doi:10.1038/s41598-017-00739-y (2017).

610 32 Zhao, L. *et al.* Long Noncoding RNA LINC00092 Acts in Cancer-Associated Fibroblasts to Drive  
611 Glycolysis and Progression of Ovarian Cancer. *Cancer Res* **77**, 1369-1382,  
612 doi:10.1158/0008-5472.can-16-1615 (2017).

613 33 Watson, M. A. *et al.* Molecular characterization of human meningiomas by gene expression  
614 profiling using high-density oligonucleotide microarrays. *The American journal of pathology* **161**,  
615 665-672, doi:10.1016/s0002-9440(10)64222-8 (2002).

616 34 Wrobel, G. *et al.* Microarray-based gene expression profiling of benign, atypical and anaplastic  
617 meningiomas identifies novel genes associated with meningioma progression. *Int J Cancer* **114**,  
618 249-256, doi:10.1002/ijc.20733 (2005).

619 35 De Craene, B. & Berx, G. Regulatory networks defining EMT during cancer initiation and  
620 progression. *Nature reviews. Cancer* **13**, 97-110, doi:10.1038/nrc3447 (2013).

621 36 Morrow, K. A. *et al.* Loss of tumor suppressor Merlin results in aberrant activation of  
622 Wnt/beta-catenin signaling in cancer. *Oncotarget* **7**, 17991-18005, doi:10.18632/oncotarget.7494  
623 (2016).

624 37 Kalluri, R. The biology and function of fibroblasts in cancer. *Nat Rev Cancer* **16**, 582-598,  
625 doi:10.1038/nrc.2016.73 (2016).

626 38 Calvo, F. *et al.* Mechanotransduction and YAP-dependent matrix remodelling is required for the  
627 generation and maintenance of cancer-associated fibroblasts. *Nat Cell Biol* **15**, 637-646,  
628 doi:10.1038/ncb2756 (2013).

629 39 Rosenbluh, J. *et al.* beta-Catenin-driven cancers require a YAP1 transcriptional complex for  
630 survival and tumorigenesis. *Cell* **151**, 1457-1473, doi:10.1016/j.cell.2012.11.026 (2012).

631 40 Mawrin, C. *et al.* Different activation of mitogen-activated protein kinase and Akt signaling is  
632 associated with aggressive phenotype of human meningiomas. *Clin Cancer Res* **11**, 4074-4082,  
633 doi:10.1158/1078-0432.ccr-04-2550 (2005).

634 41 Mawrin, C., Chung, C. & Preusser, M. Biology and clinical management challenges in  
635 meningioma. *American Society of Clinical Oncology educational book. American Society of*  
636 *Clinical Oncology. Meeting*, e106-115, doi:10.14694/EdBook\_AM.2015.35.e106 (2015).

637 42 Lopez-Lago, M. A., Okada, T., Murillo, M. M., Socci, N. & Giancotti, F. G. Loss of the tumor  
638 suppressor gene NF2, encoding merlin, constitutively activates integrin-dependent mTORC1  
639 signaling. *Mol Cell Biol* **29**, 4235-4249, doi:10.1128/mcb.01578-08 (2009).

640 43 James, M. F. *et al.* NF2/merlin is a novel negative regulator of mTOR complex 1, and activation of  
641 mTORC1 is associated with meningioma and schwannoma growth. *Molecular and cellular*  
642 *biology* **29**, 4250-4261, doi:10.1128/mcb.01581-08 (2009).

643 44 Johnson, M. D., Okedli, E., Woodard, A., Toms, S. A. & Allen, G. S. Evidence for  
644 phosphatidylinositol 3-kinase-Akt-p7S6K pathway activation and transduction of mitogenic  
645 signals by platelet-derived growth factor in meningioma cells. *Journal of neurosurgery* **97**,  
646 668-675, doi:10.3171/jns.2002.97.3.0668 (2002).

647 45 Weisman, A. S., Raguette, S. S. & Kelly, P. A. Characterization of the epidermal growth factor  
648 receptor in human meningioma. *Cancer Res* **47**, 2172-2176 (1987).

649 46 Wu, J. I., Lessard, J. & Crabtree, G. R. Understanding the words of chromatin regulation. *Cell* **136**,  
650 200-206, doi:10.1016/j.cell.2009.01.009 (2009).

651 47 Kia, S. K., Gorski, M. M., Giannakopoulos, S. & Verrijzer, C. P. SWI/SNF mediates polycomb  
652 eviction and epigenetic reprogramming of the INK4b-ARF-INK4a locus. *Mol Cell Biol* **28**,  
653 3457-3464, doi:10.1128/MCB.02019-07 (2008).

654 48 Wilson, B. G. & Roberts, C. W. SWI/SNF nucleosome remodellers and cancer. *Nat Rev Cancer* **11**,  
655 481-492, doi:10.1038/nrc3068 (2011).

656 49 Kadoch, C. & Crabtree, G. R. Mammalian SWI/SNF chromatin remodeling complexes and cancer:  
657 Mechanistic insights gained from human genomics. *Sci Adv* **1**, e1500447,  
658 doi:10.1126/sciadv.1500447 (2015).

659 50 Lichner, Z. *et al.* The chromatin remodeling gene ARID1A is a new prognostic marker in clear cell  
660 renal cell carcinoma. *Am J Pathol* **182**, 1163-1170, doi:10.1016/j.ajpath.2013.01.007 (2013).

661 51 Luchini, C. *et al.* Prognostic role and implications of mutation status of tumor suppressor gene  
662 ARID1A in cancer: a systematic review and meta-analysis. *Oncotarget* **6**, 39088-39097,  
663 doi:10.18632/oncotarget.5142 (2015).

664 52 Le Loarer, F. *et al.* SMARCA4 inactivation defines a group of undifferentiated thoracic  
665 malignancies transcriptionally related to BAF-deficient sarcomas. *Nat Genet* **47**, 1200-1205,  
666 doi:10.1038/ng.3399 (2015).

667 53 Farshidfar, F. *et al.* Integrative Genomic Analysis of Cholangiocarcinoma Identifies Distinct  
668 IDH-Mutant Molecular Profiles. *Cell reports* **18**, 2780-2794, doi:10.1016/j.celrep.2017.02.033  
669 (2017).

670 54 Liu, G. *et al.* Prognostic and Clinicopathological significance of ARID1A in endometrium-related  
671 gynecological cancers: A meta-analysis. *J Cell Biochem*, doi:10.1002/jcb.26109 (2017).

672 55 Goldbrunner, R. *et al.* EANO guidelines for the diagnosis and treatment of meningiomas. *Lancet*  
673 *Oncol* **17**, e383-391, doi:10.1016/S1470-2045(16)30321-7 (2016).

674 56 Hanahan, D. & Weinberg, R. A. Hallmarks of cancer: the next generation. *Cell* **144**, 646-674,  
675 doi:10.1016/j.cell.2011.02.013 (2011).

676 57 Shah, N. & Sukumar, S. The Hox genes and their roles in oncogenesis. *Nat Rev Cancer* **10**,  
677 361-371, doi:10.1038/nrc2826 (2010).

678 58 Xu, Q. *et al.* Long non-coding RNA regulation of epithelial-mesenchymal transition in cancer  
679 metastasis. *Cell Death Dis* **7**, e2254, doi:10.1038/cddis.2016.149 (2016).

680 59 Krumlauf, R. Hox genes in vertebrate development. *Cell* **78**, 191-201 (1994).

681 60 Xie, M. *et al.* Long noncoding RNA HOXA-AS2 promotes gastric cancer proliferation by  
682 epigenetically silencing P21/PLK3/DDIT3 expression. *Oncotarget* **6**, 33587-33601,  
683 doi:10.18632/oncotarget.5599 (2015).

684 61 Bao, X. *et al.* Knockdown of long non-coding RNA HOTAIR increases miR-454-3p by targeting  
685 Stat3 and Atg12 to inhibit chondrosarcoma growth. *Cell Death Dis* **8**, e2605,  
686 doi:10.1038/cddis.2017.31 (2017).

687 62 Gupta, R. A. *et al.* Long non-coding RNA HOTAIR reprograms chromatin state to promote cancer  
688 metastasis. *Nature* **464**, 1071-1076, doi:10.1038/nature08975 (2010).

689 63 Kim, K. *et al.* HOTAIR is a negative prognostic factor and exhibits pro-oncogenic activity in  
690 pancreatic cancer. *Oncogene* **32**, 1616-1625, (2013).

691 64 Li, X. *et al.* Long non-coding RNA HOTAIR, a driver of malignancy, predicts negative prognosis  
692 and exhibits oncogenic activity in oesophageal squamous cell carcinoma. *Br J Cancer* **109**,  
693 2266-2278, doi:10.1038/bjc.2013.548 (2013).

694 65 Ozes, A. R. *et al.* NF-kappaB-HOTAIR axis links DNA damage response, chemoresistance and  
695 cellular senescence in ovarian cancer. *Oncogene* **35**, 5350-5361, doi:10.1038/onc.2016.75 (2016).

696 66 Shi, J. *et al.* Long non-coding RNA in glioma: signaling pathways. *Oncotarget*,  
697 doi:10.18632/oncotarget.15175 (2017).

698 67 Wu, X. *et al.* HOXB7, a homeodomain protein, is overexpressed in breast cancer and confers  
699 epithelial-mesenchymal transition. *Cancer Res* **66**, 9527-9534,  
700 doi:10.1158/0008-5472.CAN-05-4470 (2006).

701 68 Hayashida, T. *et al.* HOXB9, a gene overexpressed in breast cancer, promotes tumorigenicity and  
702 lung metastasis. *Proc Natl Acad Sci U S A* **107**, 1100-1105, doi:10.1073/pnas.0912710107 (2010).

703 69 Ding, J. *et al.* Long noncoding RNA HOXA-AS2 represses P21 and KLF2 expression transcription  
704 by binding with EZH2, LSD1 in colorectal cancer. *Oncogenesis* **6**, e288,  
705 doi:10.1038/oncsis.2016.84 (2017).

706 70 Zhao, H., Zhang, X., Frazao, J. B., Condino-Neto, A. & Newburger, P. E. HOX antisense lincRNA  
707 HOXA-AS2 is an apoptosis repressor in all trans retinoic acid treated NB4 promyelocytic  
708 leukemia cells. *J Cell Biochem* **114**, 2375-2383, doi:10.1002/jcb.24586 (2013).

709 71 Ponting, C. P., Oliver, P. L. & Reik, W. Evolution and functions of long noncoding RNAs. *Cell*  
710 **136**, 629-641, doi:10.1016/j.cell.2009.02.006 (2009).

711 72 Rinn, J. L. *et al.* Functional demarcation of active and silent chromatin domains in human HOX  
712 loci by noncoding RNAs. *Cell* **129**, 1311-1323, doi:10.1016/j.cell.2007.05.022 (2007).

713 73 Khalil, A. M. *et al.* Many human large intergenic noncoding RNAs associate with  
714 chromatin-modifying complexes and affect gene expression. *Proceedings of the National Academy*  
715 *of Sciences of the United States of America* **106**, 11667-11672, doi:10.1073/pnas.0904715106  
716 (2009).

717 74 Helming, K. C., Wang, X. & Roberts, C. W. Vulnerabilities of mutant SWI/SNF complexes in  
718 cancer. *Cancer Cell* **26**, 309-317, doi:10.1016/j.ccr.2014.07.018 (2014).

719 75 Kim, K. H. *et al.* SWI/SNF-mutant cancers depend on catalytic and non-catalytic activity of  
720 EZH2. *Nat Med* **21**, 1491-1496, doi:10.1038/nm.3968 (2015).

721 76 Bitler, B. G. *et al.* Synthetic lethality by targeting EZH2 methyltransferase activity in  
722 ARID1A-mutated cancers. *Nat Med* **21**, 231-238, (2015).

723 77 Kim, K. H. & Roberts, C. W. Targeting EZH2 in cancer. *Nat Med* **22**, 128-134,  
724 doi:10.1038/nm.4036 (2016).

725 78 Ozes, A. R. *et al.* Therapeutic targeting using tumor specific peptides inhibits long non-coding  
726 RNA HOTAIR activity in ovarian and breast cancer. *Scientific reports* **7**, 894,  
727 doi:10.1038/s41598-017-00966-3 (2017).

728 79 Pfister, S. X. & Ashworth, A. Marked for death: targeting epigenetic changes in cancer. *Nature*  
729 *reviews. Drug discovery* **16**, 241-263, doi:10.1038/nrd.2016.256 (2017).

730 80 Gotwals, P. *et al.* Prospects for combining targeted and conventional cancer therapy with  
731 immunotherapy. *Nat Rev Cancer* advance online publication, doi:10.1038/nrc.2017.17 (2017).

732 81 Marcucci, F., Stassi, G. & De Maria, R. Epithelial-mesenchymal transition: a new target in  
733 anticancer drug discovery. *Nature reviews. Drug discovery* **15**, 311-325, doi:10.1038/nrd.2015.13  
734 (2016).

735 82 Norden, A. D. *et al.* Phase II trials of erlotinib or gefitinib in patients with recurrent meningioma. *J*  
736 *Neurooncol* **96**, 211-217, doi:10.1007/s11060-009-9948-7 (2010).

737 83 Byers, L. A. *et al.* An epithelial-mesenchymal transition gene signature predicts resistance to  
738 EGFR and PI3K inhibitors and identifies Axl as a therapeutic target for overcoming EGFR  
739 inhibitor resistance. *Clinical cancer research : an official journal of the American Association for*  
740 *Cancer Research* **19**, 279-290, doi:10.1158/1078-0432.ccr-12-1558 (2013).

741 84 Buonato, J. M. & Lazzara, M. J. ERK1/2 blockade prevents epithelial-mesenchymal transition in  
742 lung cancer cells and promotes their sensitivity to EGFR inhibition. *Cancer Res* **74**, 309-319,  
743 doi:10.1158/0008-5472.can-12-4721 (2014).

744 85 Thomson, S., Petti, F., Sujka-Kwok, I., Epstein, D. & Haley, J. D. Kinase switching in  
745 mesenchymal-like non-small cell lung cancer lines contributes to EGFR inhibitor resistance  
746 through pathway redundancy. *Clinical & experimental metastasis* **25**, 843-854,  
747 doi:10.1007/s10585-008-9200-4 (2008).

748 86 Marcucci, F., Stassi, G. & De Maria, R. Epithelial-mesenchymal transition: a new target in  
749 anticancer drug discovery. *Nat Rev Drug Discov* **15**, 311-325, doi:10.1038/nrd.2015.13 (2016).

750 87 Chmielecki, J. *et al.* Whole-exome sequencing identifies a recurrent NAB2-STAT6 fusion in  
751 solitary fibrous tumors. *Nat Genet* **45**, 131-132, doi:10.1038/ng.2522 (2013).

752 88 Gao, F. *et al.* Inversion-mediated gene fusions involving NAB2-STAT6 in an unusual malignant  
753 meningioma. *Br J Cancer* **109**, 1051-1055, doi:10.1038/bjc.2013.395 (2013).

754 89 Schweizer, L. *et al.* Meningeal hemangiopericytoma and solitary fibrous tumors carry the  
755 NAB2-STAT6 fusion and can be diagnosed by nuclear expression of STAT6 protein. *Acta*  
756 *Neuropathol* **125**, 651-658, doi:10.1007/s00401-013-1117-6 (2013).

757 90 Soda, M. *et al.* Identification of the transforming EML4-ALK fusion gene in non-small-cell lung  
758 cancer. *Nature* **448**, 561-566, doi:10.1038/nature05945 (2007).

759 91 Kozarewa, I. *et al.* Amplification-free Illumina sequencing-library preparation facilitates improved  
760 mapping and assembly of (G+C)-biased genomes. *Nature methods* **6**, 291-295,  
761 doi:10.1038/nmeth.1311 (2009).

762 92 Dobin, A. *et al.* STAR: ultrafast universal RNA-seq aligner. *Bioinformatics (Oxford, England)* **29**,  
763 15-21, doi:10.1093/bioinformatics/bts635 (2013).

764 93 Anders, S., Pyl, P. T. & Huber, W. HTSeq—a Python framework to work with high-throughput  
765 sequencing data. *Bioinformatics (Oxford, England)* **31**, 166-169,  
766 doi:10.1093/bioinformatics/btu638 (2015).

767 94 McPherson, A. *et al.* deFuse: an algorithm for gene fusion discovery in tumor RNA-Seq data.  
768 *PLoS computational biology* **7**, e1001138, doi:10.1371/journal.pcbi.1001138 (2011).

769 95 Kim, D. & Salzberg, S. L. TopHat-Fusion: an algorithm for discovery of novel fusion transcripts.  
770 *Genome biology* **12**, R72, doi:10.1186/gb-2011-12-8-r72 (2011).

771 96 Bignell, G. R. *et al.* Signatures of mutation and selection in the cancer genome. *Nature* **463**,  
772 893-898, doi:10.1038/nature08768 (2010).

773 97 Anders, S. & Huber, W. Differential expression analysis for sequence count data. *Genome biology*  
774 **11**, R106, doi:10.1186/gb-2010-11-10-r106 (2010).

775 98 Love, M. I., Huber, W. & Anders, S. Moderated estimation of fold change and dispersion for  
776 RNA-seq data with DESeq2. *Genome biology* **15**, 550, doi:10.1186/s13059-014-0550-8 (2014).

777 99 Peixoto, L. *et al.* How data analysis affects power, reproducibility and biological insight of  
778 RNA-seq studies in complex datasets. *Nucleic acids research* **43**, 7664-7674,  
779 doi:10.1093/nar/gkv736 (2015).

780 100 Stegle, O., Parts, L., Piipari, M., Winn, J. & Durbin, R. Using probabilistic estimation of  
781 expression residuals (PEER) to obtain increased power and interpretability of gene expression  
782 analyses. *Nat Protoc* **7**, 500-507, doi:10.1038/nprot.2011.457 (2012).

783 101 Wang, X. *et al.* Analysis of gene expression profiling in meningioma: deregulated signaling  
784 pathways associated with meningioma and EGFL6 overexpression in benign meningioma tissue  
785 and serum. *PLoS One* **7**, e52707, doi:10.1371/journal.pone.0052707 (2012).

786 102 Savvidis, C. & Koutsilieris, M. Circadian rhythm disruption in cancer biology. *Mol Med* **18**,  
787 1249-1260, doi:10.2119/molmed.2012.00077 (2012).

788 103 Sharma, S., Ray, S., Moiyadi, A., Sridhar, E. & Srivastava, S. Quantitative proteomic analysis of  
789 meningiomas for the identification of surrogate protein markers. *Sci Rep* **4**, 7140,  
790 doi:10.1038/srep07140 (2014).

791 104 Pfister, C., Tatabiga, M. S. & Roser, F. Selection of suitable reference genes for quantitative  
792 real-time polymerase chain reaction in human meningiomas and arachnoidea. *BMC Res Notes* **4**,  
793 275, doi:10.1186/1756-0500-4-275 (2011).

794 105 Luo, W., Friedman, M. S., Shedden, K., Hankenson, K. D. & Woolf, P. J. GAGE: generally  
795 applicable gene set enrichment for pathway analysis. *BMC Bioinformatics* **10**, 161,  
796 doi:10.1186/1471-2105-10-161 (2009).

797 106 Iorio, F. *et al.* Population-level characterization of pathway alterations with SLAPenrich dissects  
798 heterogeneity of cancer hallmark acquisition. *bioRxiv* doi: 10.1101/077701 (2016).

799 107 Ben-Porath, I. *et al.* An embryonic stem cell-like gene expression signature in poorly differentiated  
800 aggressive human tumors. *Nat Genet* **40**, 499-507, doi:10.1038/ng.127 (2008).

801 108 Sarrio, D. *et al.* Epithelial-mesenchymal transition in breast cancer relates to the basal-like  
802 phenotype. *Cancer Res* **68**, 989-997, doi:10.1158/0008-5472.can-07-2017 (2008).

803 109 Wong, D. J. *et al.* Module map of stem cell genes guides creation of epithelial cancer stem cells.  
804 *Cell stem cell* **2**, 333-344, doi:10.1016/j.stem.2008.02.009 (2008).

805 110 The Gene Ontology Consortium. Gene Ontology Consortium: going forward. *Nucleic acids*  
806 *research* **43**, D1049-D1056, doi:10.1093/nar/gku1179 (2015).

807 111 R: A language and environment for statistical computing (R Foundation for Statistical Computing,  
808 Vienna, Austria, 2016).

809 112 Li, H. & Durbin, R. Fast and accurate short read alignment with Burrows-Wheeler transform.  
810 *Bioinformatics (Oxford, England)* **25**, 1754-1760, doi:10.1093/bioinformatics/btp324 (2009).

811 113 Ye, K., Schulz, M. H., Long, Q., Apweiler, R. & Ning, Z. Pindel: a pattern growth approach to  
812 detect break points of large deletions and medium sized insertions from paired-end short reads.  
813 *Bioinformatics (Oxford, England)* **25**, 2865-2871, doi:10.1093/bioinformatics/btp394 (2009).

814 114 Raine, K. M. *et al.* cgpPindel: Identifying Somatic Acquired Insertion and Deletion Events  
815 from Paired End Sequencing. *Current protocols in bioinformatics* **52**, 15.17.11-12,  
816 doi:10.1002/0471250953.bi1507s52 (2015).  
817 115 Nik-Zainal, S. *et al.* Landscape of somatic mutations in 560 breast cancer whole-genome  
818 sequences. *Nature* **534**, 47-54, doi:10.1038/nature17676 (2016).  
819 116 Raine, K. M. *et al.* ascatNgs: Identifying Somatic Acquired Copy-Number Alterations from  
820 Whole-Genome Sequencing Data. *Current protocols in bioinformatics* **56**, 15.19.11-15.19.17,  
821 doi:10.1002/cpbi.17 (2016).  
822 117 Sun, L., Craiu, R. V., Paterson, A. D. & Bull, S. B. Stratified false discovery control for large-scale  
823 hypothesis testing with application to genome-wide association studies. *Genet Epidemiol* **30**,  
824 519-530, doi:10.1002/gepi.20164 (2006).  
825 118 Buels, R. *et al.* JBrowse: a dynamic web platform for genome visualization and analysis. *Genome*  
826 *biology* **17**, 66, doi:10.1186/s13059-016-0924-1 (2016).  
827 119 Chang, M. T. *et al.* Identifying recurrent mutations in cancer reveals widespread lineage diversity  
828 and mutational specificity. *Nat Biotechnol* **34**, 155-163, doi:10.1038/nbt.3391 (2016).  
829 120 Subramanian, A. *et al.* Gene set enrichment analysis: a knowledge-based approach for interpreting  
830 genome-wide expression profiles. *Proc Natl Acad Sci U S A* **102**, 15545-15550,  
831 doi:10.1073/pnas.0506580102 (2005).  
832 121 Corver, W. E. *et al.* Genome haploidisation with chromosome 7 retention in oncocytic follicular  
833 thyroid carcinoma. *PloS one* **7**, e38287, doi:10.1371/journal.pone.0038287 (2012).  
834

835

## Acknowledgements

This work was supported by the Wellcome Trust, Cancer Research UK, Meningioma UK and Tadhg and Marie-Louise Flood. U.M. was personally supported by a Cancer Research UK Clinician Scientist Fellowship; G.C. by a Wellcome Trust Clinical PhD Fellowship (WT098051); F.M. by A.I.L. (Associazione Italiana Contro le Leucemie-Linfomi e Mieloma ONLUS) and by S.I.E.S. (Società Italiana di Ematologia Sperimentale); S.B. was funded by a Wellcome Trust Intermediate Clinical Research Fellowship and a St. Baldrick's Foundation Robert J. Arceci Innovation Award. J.B. was funded by the charity Brain Tumour Research. The samples were received from the tissue banks from Cambridge (UK), Dresden (Germany), Liverpool (UK), Plymouth (UK) and Tel Aviv (Israel). The Human Research Tissue Bank is supported by the NIHR Cambridge Biomedical Research Centre. We are grateful to the patients who enabled this study and to the clinical teams coordinating their care.

## Author Contributions

G.C. and N.K. performed mRNA expression analysis. P.T. and G.C. analysed whole genome and targeted sequencing data. I.M. performed statistical analyses to detect novel driver mutations. S.M. analysed methylation array data. F.M. generated mutational signatures analysis. J.T. and M.C. performed retrotransposon analysis. C.O.H. and J.D. performed protein expression analysis. A.B, S.B. and M.Y. contributed to data analysis strategy. A.Y., T.N., G.R.B and J.T. provided informatic support. T.S., R.W.K., M.K, G.S., D.P., A.D., C.E.M., A.Y., I.N., S.J.P., C.W., Z.R., M.D.J., R.Z., and K. S. provided samples and clinical data. S.B., G.S.V, I.N. and M.W.M. provided conceptual advice. V.P.C and K.A carried out central pathology review. U.M. and T.S. devised and supervised the project. U.M. G.C. and T.S. wrote the manuscript with input from S.B., P.T., and G.S.V. All authors approved the manuscript.

863 **Competing Financial Interests:** All authors declare no competing financial interests.

864

865 Correspondence and requests for materials should be addressed to U.M.

866 ([um1@sanger.ac.uk](mailto:um1@sanger.ac.uk)) and T.S. ([ts381@cam.ac.uk](mailto:ts381@cam.ac.uk))

**Figure 1**

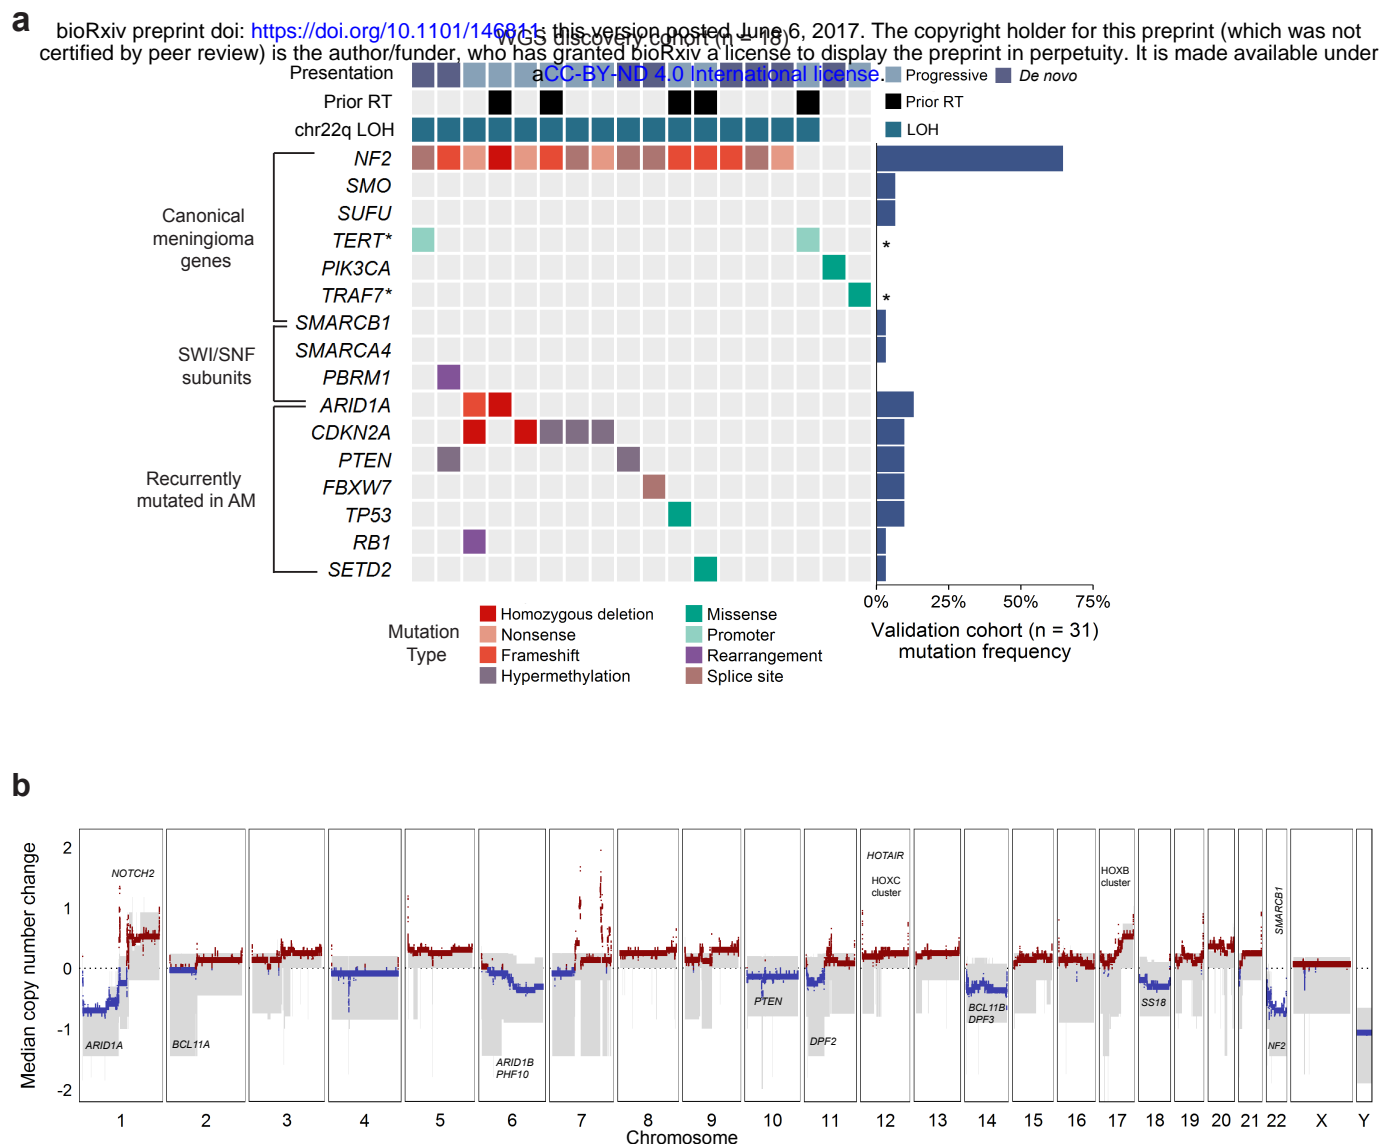

**Figure 1 | The landscape of driver mutations and copy number alterations in anaplastic meningioma. (a)** The landscape of somatic driver variants in primary anaplastic meningioma. Somatic mutation and promoter methylation data is shown for a discovery cohort of 18 primary tumours characterised by whole genome sequencing. Mutations in recurrently altered genes, established meningioma genes and SWI/SNF complex subunits are included. Samples are annotated for chromosome 22q LOH, prior radiotherapy exposure, and clinical presentation (*de novo* versus progression from a lower grade meningioma). The bar chart to the right indicates mutation frequency in a validation cohort of 31 primary tumors sequenced with a 366 cancer gene panel. Asterisks indicate genes not included in the targeted sequencing assay. **(b)** Aggregate copy number profile of primary anaplastic meningioma. For the 18 tumors characterised by whole genome sequencing, the median relative copy number change was calculated across the genome in 10 kilobase segments, adjusting for ploidy. The grey shaded area indicates the first and third quantile of copy number for each genomic segment. The solid red and blue lines represent the median relative copy number gain and loss, respectively, with zero indicating no copy number change. X-axis: Chromosomal position. Y-axis: median relative copy number change. Potential target genes are noted. AM, anaplastic meningioma; LOH, loss of heterozygosity; RT, radiotherapy.

## Figure 2

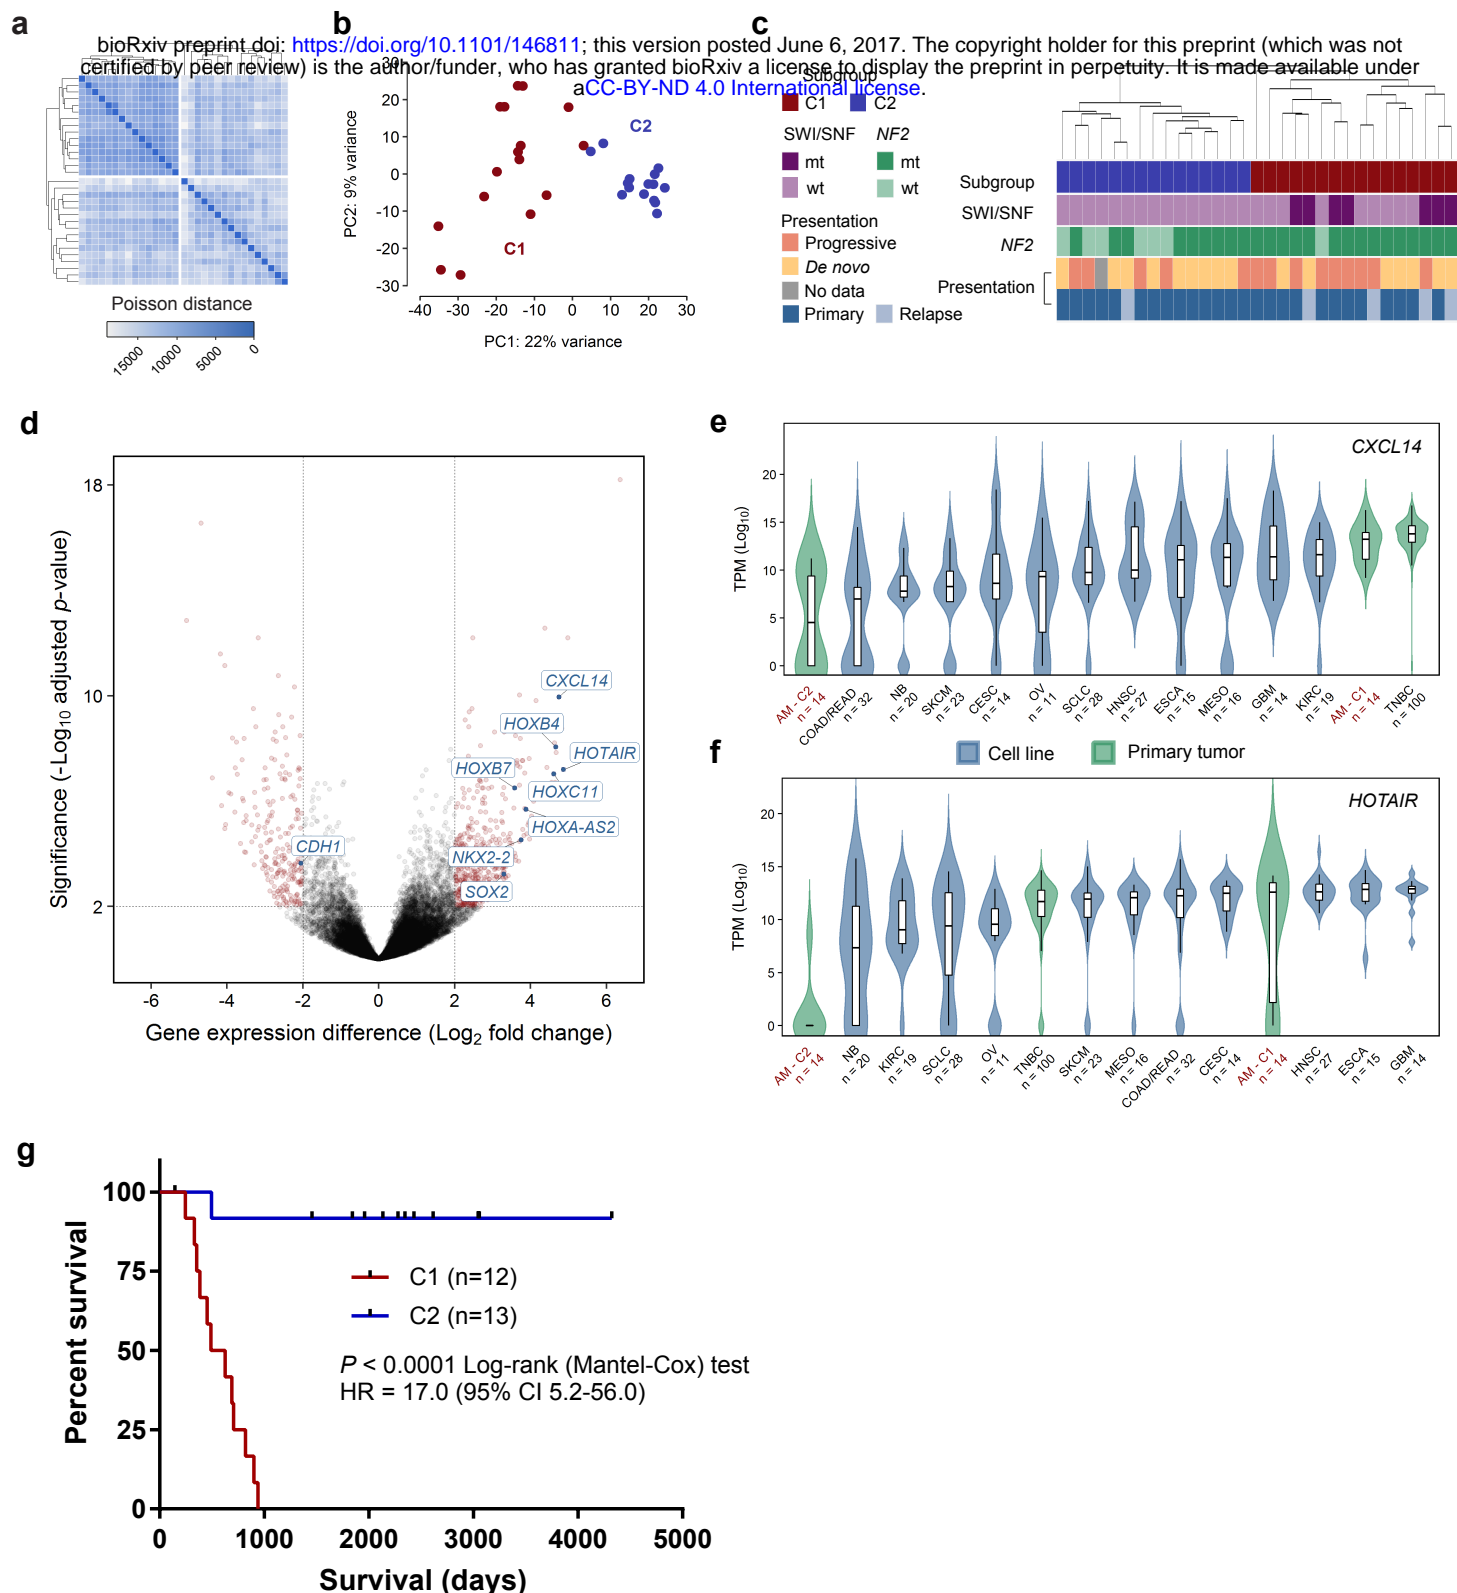

**Figure 2 | Transcriptomic classification of anaplastic meningioma.** (a) Unsupervised hierarchical clustering and (b) Principal component analysis of anaplastic meningioma gene expression revealed two subgroups (denoted C1 and C2). (c) Dendrogram obtained by unsupervised clustering annotated with clinical and genomic features. (d) Volcano plot depicting genes differentially expressed between C1 versus C2 anaplastic meningioma samples. The horizontal axis shows the log<sub>2</sub> fold change and the vertical axis indicates the -log<sub>10</sub> adjusted *p*-value. Genes with an adjusted *p*-value < 0.01 and absolute log<sub>2</sub> fold change > 2 are highlighted in red with particular genes of interest indicated. (e, f) Box plots of (e) CXCL14 and (f) HOTAIR expression across 31 anaplastic meningiomas classified into C1 and C2 subgroups, 100 primary breast tumors, and 219 cancer cell lines from 11 tumor types. Upper and lower box hinges correspond to first and third quartiles, horizontal line and whiskers indicate the median and 1.5-fold the interquartile range, respectively. Underlying violin plots show data distribution and are color-coded according to specimen source (blue, cell line; green, primary tumor). X-axis indicates tumor type and number of samples in cohort. Y-axis shows NF2 Log<sub>10</sub> TPM values. (g) Kaplan-Meier curves showing overall survival for 25 (of 28) anaplastic meningioma patients in C1 and C2 subgroups for whom follow-up data was available. Dashes indicate timepoints at which subjects were censored at time of last follow-up. TPM, transcripts per kilobase million; AM, anaplastic meningioma; TNBC, triple negative breast carcinoma; wt, wild-type; mt, mutated; HR, hazard ratio; CI, confidence interval; PC, principal component.

## Figure 3

bioRxiv preprint doi: <https://doi.org/10.1101/146811>; this version posted June 6, 2017. The copyright holder for this preprint (which was not certified by peer review) is the author/funder, who has granted bioRxiv a license to display the preprint in perpetuity. It is made available under aCC-BY-ND 4.0 International license.

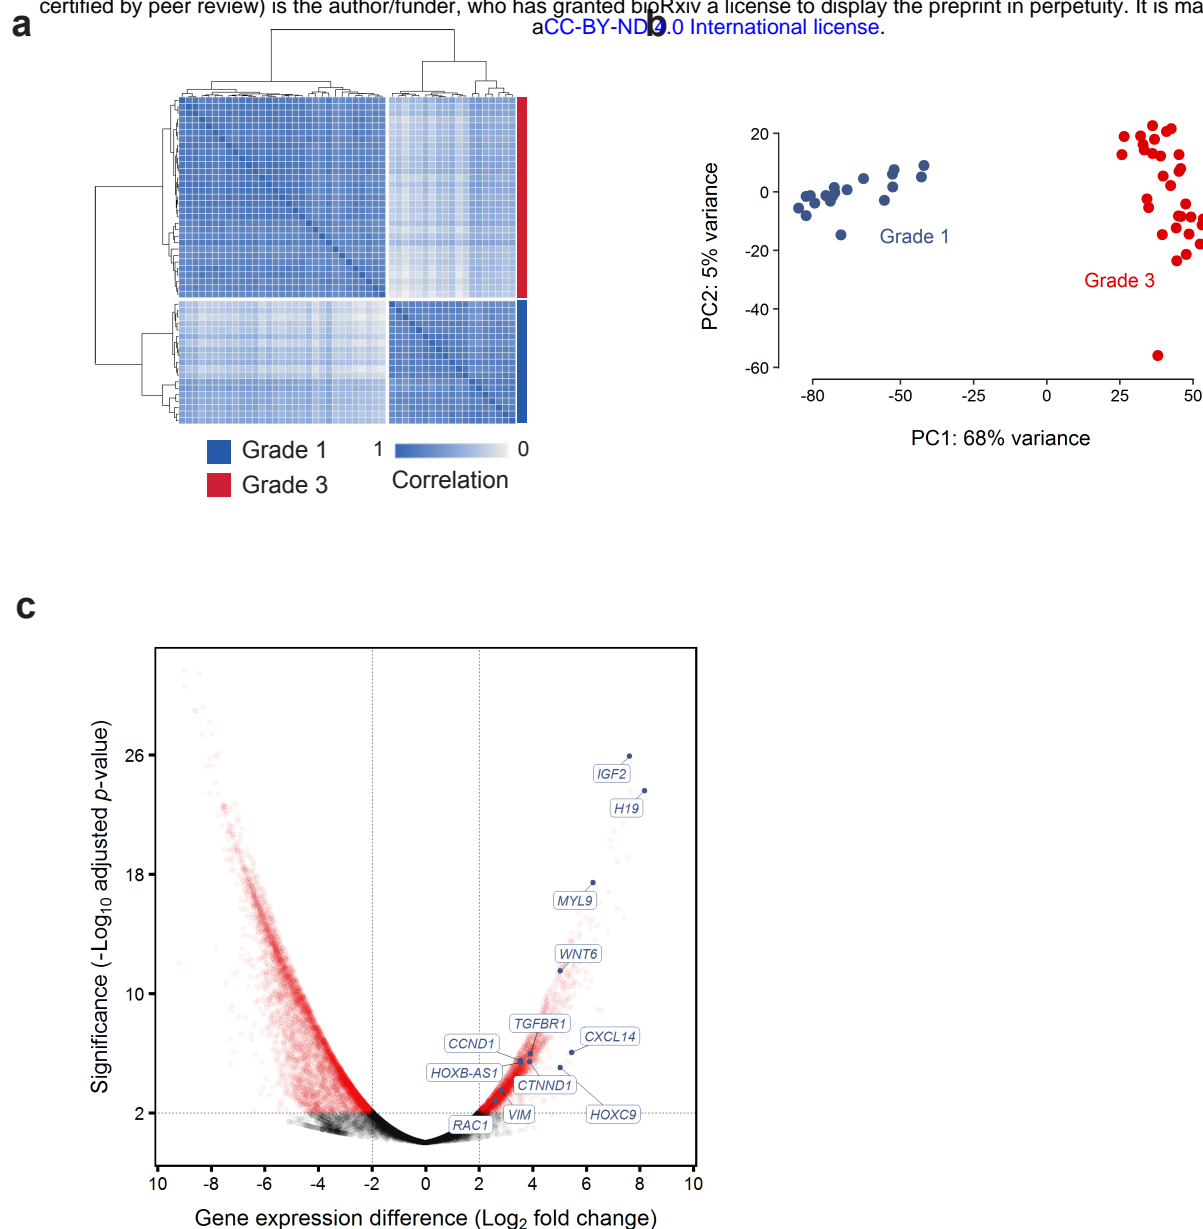

**Figure 3 | Differences in gene expression profile between grade 1 and anaplastic meningiomas.** (a, b) Normalised transcript counts from grade 1 and anaplastic meningioma samples clustered by (a) Pearson's correlation coefficient and (b) principal component analysis. (c) Volcano plot illustrating differences in gene expression between anaplastic versus grade 1 meningiomas with selected genes indicated. The horizontal axis shows the  $\log_2$  fold change and the vertical axis indicates the  $-\log_{10}$  adjusted  $p$ -value. Genes with an adjusted  $p$ -value  $< 0.01$  and absolute  $\log_2$  fold change  $> 2$  are highlighted in red. PC, principal component.
